# Supplementary material for: Asymmetric peptidoglycan editing generates cell curvature in Bdellovibrio predatory bacteria
Source: PubMed Central journal article supplement (PMC8938487; doi:10.1038/s41467-022-29007-y), 2022-03-21
Supplement: 41467_2022_29007_MOESM4_ESM.pdf [file 41467_2022_29007_MOESM4_ESM.pdf]

## Description of additional supplementary files

**File name: Supplementary Movie 1:**

Description: ***B. bacteriovorus* HD100 wild-type invasion into *E. coli* prey.**

The time interval between frames was 1 min and the scale bar = 2  $\mu\text{m}$ . The corresponding image series is shown in Supplementary Fig. 11.

**File name: Supplementary Movie 2:**

Description: ***B. bacteriovorus* HD100  $\Delta bd1075$  invasion into *E. coli* prey.**

The time interval between frames was 1 min and the scale bar = 2  $\mu\text{m}$ . The corresponding image series is shown in Supplementary Fig. 11.

**File name: Supplementary Movie 3:**

Description: ***B. bacteriovorus* HD100  $\Delta bd1075$  (comp) invasion into *E. coli* prey.**

The time interval between frames was 1 min and the scale bar = 2  $\mu\text{m}$ . The corresponding image series is shown in Supplementary Fig. 11.
